# Supplementary material for: Carrying capacity as constraint for maximum efficient CDR in agricultural soils
Source: Research Square preprint supplement (doi:10.21203/rs.3.rs-7811095/v1), 2025-12-16
Supplement: Supplementary file 1 [file 75bb38e92efb7e175eb10bb2.docx]

**Supporting Information for:**

**Carrying capacity as constraint for maximum efficient CDR in agricultural soils**

**K. Ulrich Mayer*,1, Sergio A. Bea1, Danyang Su1, Jennifer Soong1, Jenny Mills1, and Shawn G. Benner1**

**1Terradot Soil Inc., San Francisco, CA, USA**

**S.1. Supporting Tables and Figures**

Table S.1a: Calculated pore water composition (pH, [Ca], [DIC], alkalinity and SIs of major Mg-carbonate phases) for the simulation cases with pCO2 = 5,000ppm, model input shaded in green, model output shaded in orange, calcite SI ranges form 0.0 to 1.0, Mg ranges from 0 – 5 mM (24 – 122 mg L-1).

| # | **pCO2** | **calcite SI** | **Mg** | **pH** | **Ca** | **DIC** | **Total alkalinity** | **hydro-magnesite SI** | **magnesite SI** | **nesquehonite SI** |
| --- | --- | --- | --- | --- | --- | --- | --- | --- | --- | --- |
| [ppm] | [-] | [mg L-1] [mM] | [-] | [mg L-1] | [mg CO2 L-1] | [mg HCO3- L-1] | [-] | [-] | [-] |
| 1 | 5,000 | 0 | 0 (0) | 7.5 | 52 | 120 | 157 | N/A | N/A | N/A |
| 2 | 24(1) | 7.6 | 30 | 161 | 214 | -12.5 | -0.3 | -2.73 |
| 3 | 49 (2) | 7.8 | 17 | 220 | 297 | -9.8 | 0.2 | -2.19 |
| 4 | 73 (3) | 7.9 | 11 | 292 | 399 | -7.9 | 0.6 | -1.8 |
| 5 | 97 (4) | 8.0 | 7 | 370 | 510 | -6.4 | 0.9 | -1.5 |
| 6 | 122 (5) | 8.0 | 5 | 450 | 626 | -5.3 | 1.1 | -1.27 |
| 7 | 0.5 | 0 (0) | 7.7 | 79 | 179 | 239 | N/A | N/A | N/A |
| 8 | 24(1) | 7.7 | 56 | 217 | 293 | -11.4 | -0.1 | -2.5 |
| 9 | 49 (2) | 7.8 | 39 | 267 | 363 | -9.1 | 0.4 | -2.04 |
| 10 | 73 (3) | 7.9 | 28 | 328 | 451 | -7.5 | 0.7 | -1.71 |
| 11 | 97 (4) | 8.0 | 20 | 398 | 550 | -6.2 | 1.0 | -1.45 |
| 12 | 122 (5) | 8.1 | 16 | 472 | 658 | -5.1 | 1.2 | -1.24 |
| 13 | 1.0 | 0 (0) | 7.8 | 122 | 271 | 370 | N/A | N/A | N/A |
| 14 | 24(1) | 7.9 | 98 | 307 | 422 | -10.1 | 0.2 | -2.24 |
| 15 | 49 (2) | 7.9 | 79 | 351 | 485 | -8.1 | 0.6 | -1.84 |
| 16 | 73 (3) | 8.0 | 64 | 403 | 560 | -6.7 | 0.8 | -1.57 |
| 17 | 97 (4) | 8.1 | 51 | 462 | 645 | -5.7 | 1.1 | -1.35 |
| 18 | 122 (5) | 8.1 | 42 | 527 | 739 | -4.7 | 1.2 | -1.17 |

Table S.1b: Calculated pore water composition (pH, [Ca], [DIC], alkalinity and SIs of major Mg-carbonate phases) for the simulation cases with pCO2 = 10,000ppm, model input shaded in green, model output shaded in orange, calcite SI ranges form 0.0 to 1.0, Mg ranges from 0 – 5 mM (24 – 122 mg L-1).

| # | **pCO2** | **calcite SI** | **Mg** | **pH** | **Ca** | **DIC** | **Total alkalinity** | **hydro-magnesite SI** | **magnesite SI** | **nesquehonite SI** |
| --- | --- | --- | --- | --- | --- | --- | --- | --- | --- | --- |
| [ppm] | [-] | [mg L-1] [mM] | [-] | [mg L-1] | [mg CO2 L-1] | [mg HCO3- L-1] | [-] | [-] | [-] |
| 19 | 10,000 | 0 | 0 (0) | 7.3 | 66 | 159 | 201 | N/A | N/A | N/A |
| 20 | 24(1) | 7.4 | 44 | 198 | 255 | -13.7 | -0.5 | -2.89 |
| 21 | 49 (2) | 7.5 | 28 | 252 | 330 | -11.2 | 0.0 | -2.4 |
| 22 | 73 (3) | 7.6 | 19 | 318 | 423 | -9.4 | 0.4 | -2.05 |
| 23 | 97 (4) | 7.7 | 13 | 393 | 528 | -8.0 | 0.6 | -1.76 |
| 24 | 122 (5) | 7.8 | 10 | 471 | 640 | -6.9 | 0.9 | -1.54 |
| 25 | 0.5 | 0 (0) | 7.5 | 101 | 235 | 308 | N/A | N/A | N/A |
| 26 | 24(1) | 7.5 | 78 | 272 | 359 | -12.4 | -0.2 | -2.64 |
| 27 | 49 (2) | 7.6 | 59 | 319 | 424 | -10.3 | 0.2 | -2.22 |
| 28 | 73 (3) | 7.7 | 45 | 375 | 503 | -8.8 | 0.5 | -1.92 |
| 29 | 97 (4) | 7.7 | 35 | 439 | 594 | -7.6 | 0.7 | -1.69 |
| 30 | 122 (5) | 7.8 | 27 | 509 | 694 | -6.6 | 0.9 | -1.48 |
| 31 | 1.0 | 0 (0) | 7.6 | 157 | 355 | 477 | N/A | N/A | N/A |
| 32 | 24(1) | 7.7 | 133 | 391 | 527 | -11.1 | 0.0 | -2.37 |
| 33 | 49 (2) | 7.7 | 113 | 433 | 587 | -9.2 | 0.4 | -2 |
| 34 | 73 (3) | 7.8 | 95 | 481 | 655 | -7.9 | 0.7 | -1.75 |
| 35 | 97 (4) | 7.8 | 80 | 536 | 732 | -6.9 | 0.9 | -1.55 |
| 36 | 122 (5) | 7.9 | 68 | 595 | 817 | -6.1 | 1.0 | -1.38 |

Table S.1c: Calculated pore water composition (pH, [Ca], [DIC], alkalinity and SIs of major Mg-carbonate phases) for the simulation cases with pCO2 = 20,000ppm, model input shaded in green, model output shaded in orange, calcite SI ranges form 0.0 to 1.0, Mg ranges from 0 – 5 mM (24 – 122 mg L-1).

| # | **pCO2** | **calcite SI** | **Mg** | **pH** | **Ca** | **DIC** | **Total alkalinity** | **hydro-magnesite SI** | **magnesite SI** | **nesquehonite SI** |
| --- | --- | --- | --- | --- | --- | --- | --- | --- | --- | --- |
| [ppm] | [-] | [mg L-1] [mM] | [-] | [mg L-1] | [mg CO2 L-1] | [mg HCO3- L-1] | [-] | [-] | [-] |
| 37 | 20,000 | 0 | 0 (0) | 7.1 | 85 | 216 | 258 | N/A | N/A | N/A |
| 38 | 24(1) | 7.2 | 62 | 253 | 310 | -14.7 | -0.6 | -3.04 |
| 39 | 49 (2) | 7.3 | 44 | 302 | 379 | -12.5 | -0.2 | -2.6 |
| 40 | 73 (3) | 7.3 | 32 | 362 | 463 | -10.9 | 0.1 | -2.27 |
| 41 | 97 (4) | 7.4 | 23 | 431 | 559 | -9.6 | 0.4 | -2.02 |
| 42 | 122 (5) | 7.5 | 18 | 506 | 664 | -8.5 | 0.6 | -1.8 |
| 43 | 0.5 | 0 (0) | 7.3 | 130 | 315 | 396 | N/A | N/A | N/A |
| 44 | 24(1) | 7.3 | 107 | 351 | 447 | -13.4 | -0.4 | -2.78 |
| 45 | 49 (2) | 7.4 | 87 | 394 | 508 | -11.4 | 0.0 | -2.39 |
| 46 | 73 (3) | 7.4 | 70 | 445 | 580 | -10.1 | 0.3 | -2.12 |
| 47 | 97 (4) | 7.5 | 57 | 504 | 661 | -9.0 | 0.5 | -1.9 |
| 48 | 122 (5) | 7.5 | 47 | 568 | 752 | -8.1 | 0.7 | -1.72 |
| 49 | 1.0 | 0 (0) | 7.5 | 202 | 471 | 617 | N/A | N/A | N/A |
| 50 | 24(1) | 7.5 | 179 | 507 | 667 | -12.0 | -0.1 | -2.5 |
| 51 | 49 (2) | 7.5 | 157 | 547 | 724 | -10.2 | 0.3 | -2.14 |
| 52 | 73 (3) | 7.5 | 138 | 593 | 787 | -9.0 | 0.5 | -1.91 |
| 53 | 97 (4) | 7.6 | 121 | 643 | 858 | -8.1 | 0.7 | -1.73 |
| 54 | 122 (5) | 7.6 | 107 | 697 | 935 | -7.4 | 0.8 | -1.57 |

Table S.2a: Maximum effective CDR [tn CO2 ha-1 yr-1] calculated as the product of groundwater recharge and dissolved inorganic carbon as a function of a range of groundwater recharge rates [mm yr-1] for the simulation cases with pCO2 = 5,000ppm at T = 25°C. Color shading indicates the range of maximum efficient CDR. white: < 0.5 tn CO2 ha-1 yr-1, green: 0.5 – < 1 tn CO2 ha-1 yr-1, blue: 1-2 tn CO2 ha-1 yr-1, orange: > 2 tn CO2 ha-1 yr-1.

| **#/qr** | **Code** | **50** | **100** | **150** | **200** | **250** | **300** | **350** | **400** | **500** | **600** | **700** | **800** | **900** | **1000** |
| --- | --- | --- | --- | --- | --- | --- | --- | --- | --- | --- | --- | --- | --- | --- | --- |
| 1 | 5-0-0 | 0.06 | 0.12 | 0.18 | 0.24 | 0.30 | 0.36 | 0.42 | 0.48 | 0.60 | 0.72 | 0.84 | 0.96 | 1.08 | 1.20 |
| 2 | 5-0-1 | 0.08 | 0.16 | 0.24 | 0.32 | 0.40 | 0.48 | 0.56 | 0.64 | 0.81 | 0.97 | 1.13 | 1.29 | 1.45 | 1.61 |
| 3 | 5-0-2 | 0.11 | 0.22 | 0.33 | 0.44 | 0.55 | 0.66 | 0.77 | 0.88 | 1.10 | 1.32 | 1.54 | 1.76 | 1.98 | 2.20 |
| 4 | 5-0-3 | 0.15 | 0.29 | 0.44 | 0.58 | 0.73 | 0.88 | 1.02 | 1.17 | 1.46 | 1.75 | 2.04 | 2.34 | 2.63 | 2.92 |
| 5 | 5-0-4 | 0.19 | 0.37 | 0.56 | 0.74 | 0.93 | 1.11 | 1.30 | 1.48 | 1.85 | 2.22 | 2.59 | 2.96 | 3.33 | 3.70 |
| 6 | 5-0-5 | 0.23 | 0.45 | 0.68 | 0.90 | 1.13 | 1.35 | 1.58 | 1.80 | 2.25 | 2.70 | 3.15 | 3.60 | 4.05 | 4.50 |
| 7 | 5-5-0 | 0.09 | 0.18 | 0.27 | 0.36 | 0.45 | 0.54 | 0.63 | 0.72 | 0.90 | 1.07 | 1.25 | 1.43 | 1.61 | 1.79 |
| 8 | 5-5-1 | 0.11 | 0.22 | 0.33 | 0.43 | 0.54 | 0.65 | 0.76 | 0.87 | 1.09 | 1.30 | 1.52 | 1.74 | 1.95 | 2.17 |
| 9 | 5-5-2 | 0.13 | 0.27 | 0.40 | 0.53 | 0.67 | 0.80 | 0.93 | 1.07 | 1.34 | 1.60 | 1.87 | 2.14 | 2.40 | 2.67 |
| 10 | 5-5-3 | 0.16 | 0.33 | 0.49 | 0.66 | 0.82 | 0.98 | 1.15 | 1.31 | 1.64 | 1.97 | 2.30 | 2.62 | 2.95 | 3.28 |
| 11 | 5-5-4 | 0.20 | 0.40 | 0.60 | 0.80 | 1.00 | 1.19 | 1.39 | 1.59 | 1.99 | 2.39 | 2.79 | 3.18 | 3.58 | 3.98 |
| 12 | 5-5-5 | 0.24 | 0.47 | 0.71 | 0.94 | 1.18 | 1.42 | 1.65 | 1.89 | 2.36 | 2.83 | 3.30 | 3.78 | 4.25 | 4.72 |
| 13 | 5-10-0 | 0.14 | 0.27 | 0.41 | 0.54 | 0.68 | 0.81 | 0.95 | 1.08 | 1.36 | 1.63 | 1.90 | 2.17 | 2.44 | 2.71 |
| 14 | 5-10-1 | 0.15 | 0.31 | 0.46 | 0.61 | 0.77 | 0.92 | 1.07 | 1.23 | 1.54 | 1.84 | 2.15 | 2.46 | 2.76 | 3.07 |
| 15 | 5-10-2 | 0.18 | 0.35 | 0.53 | 0.70 | 0.88 | 1.05 | 1.23 | 1.40 | 1.76 | 2.11 | 2.46 | 2.81 | 3.16 | 3.51 |
| 16 | 5-10-3 | 0.20 | 0.40 | 0.60 | 0.81 | 1.01 | 1.21 | 1.41 | 1.61 | 2.02 | 2.42 | 2.82 | 3.22 | 3.63 | 4.03 |
| 17 | 5-10-4 | 0.23 | 0.46 | 0.69 | 0.92 | 1.16 | 1.39 | 1.62 | 1.85 | 2.31 | 2.77 | 3.23 | 3.70 | 4.16 | 4.62 |
| 18 | 5-10-5 | 0.26 | 0.53 | 0.79 | 1.05 | 1.32 | 1.58 | 1.84 | 2.11 | 2.64 | 3.16 | 3.69 | 4.22 | 4.74 | 5.27 |

Table S.2b: Maximum effective CDR [tn CO2 ha-1 yr-1] calculated as the product of groundwater recharge and dissolved inorganic carbon as a function of a range of groundwater recharge rates [mm yr-1] for the simulation cases with pCO2 = 10,000ppm at T = 25°C. Color shading indicates the range of maximum efficient CDR. white: < 0.5 tn CO2 ha-1 yr-1, green: 0.5 – < 1 tn CO2 ha-1 yr-1, blue: 1-2 tn CO2 ha-1 yr-1, orange: > 2 tn CO2 ha-1 yr-1.

| **#/qr** | **Code** | **50** | **100** | **150** | **200** | **250** | **300** | **350** | **400** | **500** | **600** | **700** | **800** | **900** | **1000** |
| --- | --- | --- | --- | --- | --- | --- | --- | --- | --- | --- | --- | --- | --- | --- | --- |
| 19 | 10-0-0 | 0.08 | 0.16 | 0.24 | 0.32 | 0.40 | 0.48 | 0.56 | 0.64 | 0.80 | 0.96 | 1.12 | 1.27 | 1.43 | 1.59 |
| 20 | 10-0-1 | 0.10 | 0.20 | 0.30 | 0.40 | 0.50 | 0.59 | 0.69 | 0.79 | 0.99 | 1.19 | 1.39 | 1.59 | 1.78 | 1.98 |
| 21 | 10-0-2 | 0.13 | 0.25 | 0.38 | 0.50 | 0.63 | 0.76 | 0.88 | 1.01 | 1.26 | 1.51 | 1.76 | 2.01 | 2.27 | 2.52 |
| 22 | 10-0-3 | 0.16 | 0.32 | 0.48 | 0.64 | 0.80 | 0.95 | 1.11 | 1.27 | 1.59 | 1.91 | 2.23 | 2.55 | 2.86 | 3.18 |
| 23 | 10-0-4 | 0.20 | 0.39 | 0.59 | 0.79 | 0.98 | 1.18 | 1.37 | 1.57 | 1.96 | 2.36 | 2.75 | 3.14 | 3.53 | 3.93 |
| 24 | 10-0-5 | 0.24 | 0.47 | 0.71 | 0.94 | 1.18 | 1.41 | 1.65 | 1.88 | 2.36 | 2.83 | 3.30 | 3.77 | 4.24 | 4.71 |
| 25 | 10-5-0 | 0.12 | 0.24 | 0.35 | 0.47 | 0.59 | 0.71 | 0.82 | 0.94 | 1.18 | 1.41 | 1.65 | 1.88 | 2.12 | 2.35 |
| 26 | 10-5-1 | 0.14 | 0.27 | 0.41 | 0.54 | 0.68 | 0.82 | 0.95 | 1.09 | 1.36 | 1.63 | 1.91 | 2.18 | 2.45 | 2.72 |
| 27 | 10-5-2 | 0.16 | 0.32 | 0.48 | 0.64 | 0.80 | 0.96 | 1.12 | 1.27 | 1.59 | 1.91 | 2.23 | 2.55 | 2.87 | 3.19 |
| 28 | 10-5-3 | 0.19 | 0.37 | 0.56 | 0.75 | 0.94 | 1.12 | 1.31 | 1.50 | 1.87 | 2.25 | 2.62 | 3.00 | 3.37 | 3.75 |
| 29 | 10-5-4 | 0.22 | 0.44 | 0.66 | 0.88 | 1.10 | 1.32 | 1.54 | 1.76 | 2.19 | 2.63 | 3.07 | 3.51 | 3.95 | 4.39 |
| 30 | 10-5-5 | 0.25 | 0.51 | 0.76 | 1.02 | 1.27 | 1.53 | 1.78 | 2.04 | 2.55 | 3.05 | 3.56 | 4.07 | 4.58 | 5.09 |
| 31 | 10-10-0 | 0.18 | 0.36 | 0.53 | 0.71 | 0.89 | 1.07 | 1.24 | 1.42 | 1.78 | 2.13 | 2.49 | 2.84 | 3.20 | 3.55 |
| 32 | 10-10-1 | 0.20 | 0.39 | 0.59 | 0.78 | 0.98 | 1.17 | 1.37 | 1.56 | 1.96 | 2.35 | 2.74 | 3.13 | 3.52 | 3.91 |
| 33 | 10-10-2 | 0.22 | 0.43 | 0.65 | 0.87 | 1.08 | 1.30 | 1.52 | 1.73 | 2.17 | 2.60 | 3.03 | 3.46 | 3.90 | 4.33 |
| 34 | 10-10-3 | 0.24 | 0.48 | 0.72 | 0.96 | 1.20 | 1.44 | 1.68 | 1.92 | 2.41 | 2.89 | 3.37 | 3.85 | 4.33 | 4.81 |
| 35 | 10-10-4 | 0.27 | 0.54 | 0.80 | 1.07 | 1.34 | 1.61 | 1.88 | 2.14 | 2.68 | 3.22 | 3.75 | 4.29 | 4.82 | 5.36 |
| 36 | 10-10-5 | 0.30 | 0.60 | 0.89 | 1.19 | 1.49 | 1.79 | 2.08 | 2.38 | 2.98 | 3.57 | 4.17 | 4.76 | 5.36 | 5.95 |

Table S.2c: Maximum effective CDR [tn CO2 ha-1 yr-1] calculated as the product of groundwater recharge and dissolved inorganic carbon as a function of a range of groundwater recharge rates [mm yr-1] for the simulation cases with pCO2 = 20,,000ppm at T = 25°C. Color shading indicates the range of maximum efficient CDR. white: < 0.5 tn CO2 ha-1 yr-1, green: 0.5 – < 1 tn CO2 ha-1 yr-1, blue: 1-2 tn CO2 ha-1 yr-1, orange: > 2 tn CO2 ha-1 yr-1.

| **#/qr** | **Code** | **50** | **100** | **150** | **200** | **250** | **300** | **350** | **400** | **500** | **600** | **700** | **800** | **900** | **1000** |
| --- | --- | --- | --- | --- | --- | --- | --- | --- | --- | --- | --- | --- | --- | --- | --- |
| 37 | 20-0-0 | 0.11 | 0.22 | 0.32 | 0.43 | 0.54 | 0.65 | 0.75 | 0.86 | 1.08 | 1.29 | 1.51 | 1.72 | 1.94 | 2.16 |
| 38 | 20-0-1 | 0.13 | 0.25 | 0.38 | 0.51 | 0.63 | 0.76 | 0.89 | 1.01 | 1.27 | 1.52 | 1.77 | 2.02 | 2.28 | 2.53 |
| 39 | 20-0-2 | 0.15 | 0.30 | 0.45 | 0.60 | 0.76 | 0.91 | 1.06 | 1.21 | 1.51 | 1.81 | 2.11 | 2.42 | 2.72 | 3.02 |
| 40 | 20-0-3 | 0.18 | 0.36 | 0.54 | 0.72 | 0.91 | 1.09 | 1.27 | 1.45 | 1.81 | 2.17 | 2.54 | 2.90 | 3.26 | 3.62 |
| 41 | 20-0-4 | 0.22 | 0.43 | 0.65 | 0.86 | 1.08 | 1.29 | 1.51 | 1.73 | 2.16 | 2.59 | 3.02 | 3.45 | 3.88 | 4.31 |
| 42 | 20-0-5 | 0.25 | 0.51 | 0.76 | 1.01 | 1.27 | 1.52 | 1.77 | 2.02 | 2.53 | 3.04 | 3.54 | 4.05 | 4.55 | 5.06 |
| 43 | 20-5-0 | 0.16 | 0.31 | 0.47 | 0.63 | 0.79 | 0.94 | 1.10 | 1.26 | 1.57 | 1.89 | 2.20 | 2.52 | 2.83 | 3.15 |
| 44 | 20-5-1 | 0.18 | 0.35 | 0.53 | 0.70 | 0.88 | 1.05 | 1.23 | 1.40 | 1.75 | 2.10 | 2.46 | 2.81 | 3.16 | 3.51 |
| 45 | 20-5-2 | 0.20 | 0.39 | 0.59 | 0.79 | 0.99 | 1.18 | 1.38 | 1.58 | 1.97 | 2.37 | 2.76 | 3.15 | 3.55 | 3.94 |
| 46 | 20-5-3 | 0.22 | 0.45 | 0.67 | 0.89 | 1.11 | 1.34 | 1.56 | 1.78 | 2.23 | 2.67 | 3.12 | 3.56 | 4.01 | 4.45 |
| 47 | 20-5-4 | 0.25 | 0.50 | 0.76 | 1.01 | 1.26 | 1.51 | 1.76 | 2.02 | 2.52 | 3.02 | 3.53 | 4.03 | 4.53 | 5.04 |
| 48 | 20-5-5 | 0.28 | 0.57 | 0.85 | 1.14 | 1.42 | 1.71 | 1.99 | 2.27 | 2.84 | 3.41 | 3.98 | 4.55 | 5.12 | 5.68 |
| 49 | 20-10-0 | 0.24 | 0.47 | 0.71 | 0.94 | 1.18 | 1.41 | 1.65 | 1.88 | 2.36 | 2.83 | 3.30 | 3.77 | 4.24 | 4.71 |
| 50 | 20-10-1 | 0.25 | 0.51 | 0.76 | 1.01 | 1.27 | 1.52 | 1.77 | 2.03 | 2.54 | 3.04 | 3.55 | 4.06 | 4.56 | 5.07 |
| 51 | 20-10-2 | 0.27 | 0.55 | 0.82 | 1.09 | 1.37 | 1.64 | 1.91 | 2.19 | 2.74 | 3.28 | 3.83 | 4.38 | 4.92 | 5.47 |
| 52 | 20-10-3 | 0.30 | 0.59 | 0.89 | 1.19 | 1.48 | 1.78 | 2.08 | 2.37 | 2.97 | 3.56 | 4.15 | 4.74 | 5.34 | 5.93 |
| 53 | 20-10-4 | 0.32 | 0.64 | 0.96 | 1.29 | 1.61 | 1.93 | 2.25 | 2.57 | 3.22 | 3.86 | 4.50 | 5.14 | 5.79 | 6.43 |
| 54 | 20-10-5 | 0.35 | 0.70 | 1.05 | 1.39 | 1.74 | 2.09 | 2.44 | 2.79 | 3.49 | 4.18 | 4.88 | 5.58 | 6.27 | 6.97 |

Table S.3a: Global annual maximum efficient CDR [gt CO2 yr-1] for simulations cases with pCO2 = 5,000 ppm for terrestrial surface covered by cropland based on 2024 data from Dynamic World1 (2024-01-01 to 2024-12-31). In addition, cropland area [ha] and percentage of total cropland [%] with maximum efficient CDR [tn CO2 ha-1 yr-1] exceeding 0.5, 1, and 2 tn CO2 ha-1 yr-1 are provided. The simulation code refers to pCO2, calcite SI, and Mg concentrations, e.g. 5_5_1: pCO2 = 5,000 ppm, calcite SI = 0.5, [Mg] = 1 mM.

|  |  | **Global annual maximum achievable CDR**  **[gt CO2 yr-1]** | **Land area [ha] with maximum achievable CDR** **[tn CO2 ha-1 yr-1] greater than** | | | **Percentage of cropland [%] with maximum achievable CDR [tn CO2 ha-1 yr-1] greater than** | | |
| --- | --- | --- | --- | --- | --- | --- | --- | --- |
| **Simulation** | **Code** | **0.5** | **1.0** | **2.0** | **0.5** | **1.0** | **2.0** |
| 1 | 5_0_0 | 0.15 | 1.8E+07 | 9.1E+05 | 0.0E+00 | 1.3 | 0.1 | 0.0 |
| 2 | 5_0_1 | 0.20 | 5.4E+07 | 4.4E+06 | 0.0E+00 | 4.1 | 0.3 | 0.0 |
| 3 | 5_0_2 | 0.26 | 1.2E+08 | 1.1E+07 | 7.0E+05 | 9.2 | 0.8 | 0.1 |
| 4 | 5_0_3 | 0.34 | 1.7E+08 | 4.1E+07 | 3.0E+06 | 13.1 | 3.1 | 0.2 |
| 5 | 5_0_4 | 0.43 | 2.4E+08 | 7.9E+07 | 7.0E+06 | 18.2 | 5.9 | 0.5 |
| 6 | 5_0_5 | 0.52 | 3.1E+08 | 1.3E+08 | 1.4E+07 | 23.6 | 9.9 | 1.1 |
| 7 | 5_5_0 | 0.23 | 7.7E+07 | 5.5E+06 | 0.0E+00 | 5.7 | 0.4 | 0.0 |
| 8 | 5_5_1 | 0.27 | 1.3E+08 | 1.2E+07 | 4.6E+05 | 9.6 | 0.9 | 0.0 |
| 9 | 5_5_2 | 0.32 | 1.7E+08 | 3.1E+07 | 2.3E+06 | 12.5 | 2.4 | 0.2 |
| 10 | 5_5_3 | 0.39 | 2.2E+08 | 5.6E+07 | 4.9E+06 | 16.8 | 4.2 | 0.4 |
| 11 | 5_5_4 | 0.47 | 3.0E+08 | 9.3E+07 | 8.9E+06 | 22.6 | 7.0 | 0.7 |
| 12 | 5_5_5 | 0.55 | 3.5E+08 | 1.4E+08 | 1.7E+07 | 25.8 | 10.2 | 1.3 |
| 13 | 5_10_0 | 0.34 | 1.8E+08 | 3.4E+07 | 2.5E+06 | 13.8 | 2.6 | 0.2 |
| 14 | 5_10_1 | 0.38 | 2.2E+08 | 4.8E+07 | 3.2E+06 | 16.5 | 3.6 | 0.2 |
| 15 | 5_10_2 | 0.43 | 2.7E+08 | 7.1E+07 | 5.3E+06 | 20.2 | 5.3 | 0.4 |
| 16 | 5_10_3 | 0.49 | 3.2E+08 | 1.0E+08 | 9.0E+06 | 23.7 | 7.8 | 0.7 |
| 17 | 5_10_4 | 0.55 | 3.7E+08 | 1.4E+08 | 1.5E+07 | 27.7 | 10.5 | 1.1 |
| 18 | 5_10_5 | 0.62 | 4.2E+08 | 1.6E+08 | 3.0E+07 | 31.1 | 12.0 | 2.2 |

Table S.3b: Global annual maximum efficient CDR [gt CO2 yr-1] for simulations cases with pCO2 = 10,000 ppm for terrestrial surface covered by cropland based on 2024 data from Dynamic World1 (2024-01-01 to 2024-12-31). In addition, cropland area [ha] and percentage of total cropland [%] with maximum efficient CDR [tn CO2 ha-1 yr-1] exceeding 0.5, 1, and 2 tn CO2 ha-1 yr-1 are provided. The simulation code refers to pCO2, calcite SI, and Mg concentrations, e.g. 10_5_1: pCO2 = 10,000 ppm, calcite SI = 0.5, [Mg] = 1 mM.

|  |  | **Global annual maximum achievable CDR**  **[gt CO2 yr-1]** | **Land area [ha] with maximum achievable CDR [tn CO2 ha-1 yr-1] greater than** | | | **Percentage of cropland [%] with maximum achievable CDR [tn CO2 ha-1 yr-1] greater than** | | |
| --- | --- | --- | --- | --- | --- | --- | --- | --- |
| **Simulation** | **Code** | **0.5** | **1.0** | **2.0** | **0.5** | **1.0** | **2.0** |
| 19 | 10_0_0 | 0.20 | 5.5E+07 | 3.4E+06 | 0.0E+00 | 4.1 | 0.3 | 0.0 |
| 20 | 10_0_1 | 0.25 | 1.0E+08 | 7.9E+06 | 0.0E+00 | 7.5 | 0.6 | 0.0 |
| 21 | 10_0_2 | 0.30 | 1.5E+08 | 2.5E+07 | 1.9E+06 | 11.3 | 1.9 | 0.1 |
| 22 | 10_0_3 | 0.38 | 2.1E+08 | 5.3E+07 | 4.0E+06 | 15.5 | 3.9 | 0.3 |
| 23 | 10_0_4 | 0.46 | 3.0E+08 | 8.8E+07 | 8.9E+06 | 22.4 | 6.6 | 0.7 |
| 24 | 10_0_5 | 0.55 | 3.4E+08 | 1.3E+08 | 1.6E+07 | 25.1 | 10.0 | 1.2 |
| 25 | 10_5_0 | 0.30 | 1.5E+08 | 1.6E+07 | 9.1E+05 | 11.2 | 1.2 | 0.1 |
| 26 | 10_5_1 | 0.34 | 1.8E+08 | 3.5E+07 | 2.5E+06 | 13.6 | 2.6 | 0.2 |
| 27 | 10_5_2 | 0.39 | 2.3E+08 | 5.3E+07 | 4.2E+06 | 17.2 | 4.0 | 0.3 |
| 28 | 10_5_3 | 0.45 | 2.9E+08 | 8.7E+07 | 5.8E+06 | 21.9 | 6.5 | 0.4 |
| 29 | 10_5_4 | 0.52 | 3.3E+08 | 1.2E+08 | 1.1E+07 | 24.9 | 9.2 | 0.8 |
| 30 | 10_5_5 | 0.60 | 4.0E+08 | 1.5E+08 | 2.5E+07 | 29.9 | 11.4 | 1.9 |
| 31 | 10_10_0 | 0.45 | 2.9E+08 | 7.5E+07 | 5.5E+06 | 22.0 | 5.6 | 0.4 |
| 32 | 10_10_1 | 0.49 | 3.2E+08 | 9.9E+07 | 6.4E+06 | 24.1 | 7.4 | 0.5 |
| 33 | 10_10_2 | 0.54 | 3.7E+08 | 1.3E+08 | 1.2E+07 | 27.5 | 9.6 | 0.9 |
| 34 | 10_10_3 | 0.59 | 4.0E+08 | 1.5E+08 | 1.8E+07 | 30.0 | 10.9 | 1.4 |
| 35 | 10_10_4 | 0.65 | 4.4E+08 | 1.7E+08 | 3.2E+07 | 32.9 | 12.5 | 2.4 |
| 36 | 10_10_5 | 0.71 | 4.8E+08 | 1.9E+08 | 4.4E+07 | 35.6 | 14.1 | 3.3 |

Table S.3c: Global annual maximum efficient CDR [gt CO2 yr-1] for simulations cases with pCO2 = 20,000 ppm for terrestrial surface covered by cropland based on 2024 data from Dynamic World1 (2024-01-01 to 2024-12-31). In addition, cropland area [ha] and percentage of total cropland [%] with maximum efficient CDR [tn CO2 ha-1 yr-1] exceeding 0.5, 1, and 2 tn CO2 ha-1 yr-1 are provided. The simulation code refers to pCO2, calcite SI, and Mg concentrations, e.g. 20_5_1: pCO2 = 20,000 ppm, calcite SI = 0.5, [Mg] = 1 mM.

|  |  | **Global annual maximum achievable CDR**  **[gt CO2 yr-1]** | **Land area [ha] with maximum achievable CDR [tn CO2 ha-1 yr-1] greater than** | | | **Percentage of cropland [%] with maximum achievable CDR [tn CO2 ha-1 yr-1] greater than** | | |
| --- | --- | --- | --- | --- | --- | --- | --- | --- |
| **Simulation** | **Code** | **0.5** | **1.0** | **2.0** | **0.5** | **1.0** | **2.0** |
| 37 | 20_0_0 | 0.28 | 1.3E+08 | 1.2E+07 | 2.3E+05 | 9.7 | 0.9 | 0.0 |
| 38 | 20_0_1 | 0.32 | 1.6E+08 | 2.4E+07 | 1.6E+06 | 11.8 | 1.8 | 0.1 |
| 39 | 20_0_2 | 0.37 | 2.1E+08 | 4.5E+07 | 3.2E+06 | 15.3 | 3.4 | 0.2 |
| 40 | 20_0_3 | 0.44 | 2.8E+08 | 7.5E+07 | 5.6E+06 | 20.7 | 5.6 | 0.4 |
| 41 | 20_0_4 | 0.51 | 3.3E+08 | 1.2E+08 | 1.1E+07 | 24.5 | 9.0 | 0.8 |
| 42 | 20_0_5 | 0.59 | 4.0E+08 | 1.5E+08 | 2.4E+07 | 29.6 | 11.2 | 1.8 |
| 43 | 20_5_0 | 0.40 | 2.4E+08 | 5.4E+07 | 3.2E+06 | 18.2 | 4.0 | 0.2 |
| 44 | 20_5_1 | 0.44 | 2.9E+08 | 7.2E+07 | 5.5E+06 | 21.4 | 5.4 | 0.4 |
| 45 | 20_5_2 | 0.49 | 3.2E+08 | 9.9E+07 | 6.9E+06 | 23.9 | 7.4 | 0.5 |
| 46 | 20_5_3 | 0.55 | 3.7E+08 | 1.3E+08 | 1.2E+07 | 27.7 | 9.8 | 0.9 |
| 47 | 20_5_4 | 0.61 | 4.1E+08 | 1.5E+08 | 2.5E+07 | 30.4 | 11.3 | 1.9 |
| 48 | 20_5_5 | 0.68 | 4.6E+08 | 1.7E+08 | 3.9E+07 | 34.4 | 12.9 | 2.9 |
| 49 | 20_10_0 | 0.60 | 4.1E+08 | 1.5E+08 | 1.6E+07 | 30.8 | 11.2 | 1.2 |
| 50 | 20_10_1 | 0.64 | 4.4E+08 | 1.6E+08 | 2.5E+07 | 32.7 | 11.9 | 1.8 |
| 51 | 20_10_2 | 0.68 | 4.8E+08 | 1.8E+08 | 3.5E+07 | 35.9 | 13.7 | 2.6 |
| 52 | 20_10_3 | 0.73 | 5.0E+08 | 2.0E+08 | 4.3E+07 | 37.4 | 15.2 | 3.2 |
| 53 | 20_10_4 | 0.79 | 5.3E+08 | 2.3E+08 | 5.4E+07 | 39.6 | 17.3 | 4.0 |
| 54 | 20_10_5 | 0.85 | 5.7E+08 | 2.6E+08 | 7.0E+07 | 42.8 | 19.5 | 5.2 |

Table S.4a: Global annual maximum efficient CDR [gt CO2 yr-1] for simulations cases with pCO2 = 5,000 ppm for terrestrial surface covered by cropland and grassland based on 2024 data from Dynamic World1 (2024-01-01 to 2024-12-31). In addition, combined cropland and grassland area [ha] and percentage of total cropland and grassland [%] with maximum efficient CDR [tn CO2 ha-1 yr-1] exceeding 0.5, 1, and 2 tn CO2 ha-1 yr-1 are provided. The simulation code refers to pCO2, calcite SI, and Mg concentrations, e.g. 5_5_1: pCO2 = 5,000 ppm, calcite SI = 0.5, [Mg] = 1 mM.

|  |  | **Global annual maximum achievable CDR**  **[gt CO2 yr-1]** | **Land area [ha] with maximum achievable CDR [tn CO2 ha-1 yr-1] greater than** | | | **Percentage of crop- and grasslands [%] with maximum achievable CDR [tn CO2 ha-1 yr-1] greater than** | | |
| --- | --- | --- | --- | --- | --- | --- | --- | --- |
| **Simulation** | **Code** | **0.5** | **1.0** | **2.0** | **0.5** | **1.0** | **2.0** |
| 1 | 5_0_0 | 0.24 | 5.2E+07 | 2.3E+06 | 0.0E+00 | 2.9 | 0.1 | 0.0 |
| 2 | 5_0_1 | 0.32 | 1.2E+08 | 1.3E+07 | 0.0E+00 | 6.6 | 0.7 | 0.0 |
| 3 | 5_0_2 | 0.42 | 2.3E+08 | 3.7E+07 | 2.1E+06 | 13.1 | 2.1 | 0.1 |
| 4 | 5_0_3 | 0.55 | 3.2E+08 | 9.3E+07 | 9.1E+06 | 18.2 | 5.2 | 0.5 |
| 5 | 5_0_4 | 0.69 | 4.3E+08 | 1.6E+08 | 2.0E+07 | 23.9 | 9.1 | 1.1 |
| 6 | 5_0_5 | 0.84 | 5.3E+08 | 2.5E+08 | 4.2E+07 | 29.6 | 14.0 | 2.4 |
| 7 | 5_5_0 | 0.36 | 1.5E+08 | 1.9E+07 | 1.4E+05 | 8.6 | 1.1 | 0.0 |
| 8 | 5_5_1 | 0.43 | 2.4E+08 | 3.5E+07 | 8.4E+05 | 13.4 | 2.0 | 0.0 |
| 9 | 5_5_2 | 0.52 | 3.1E+08 | 7.5E+07 | 5.2E+06 | 17.5 | 4.2 | 0.3 |
| 10 | 5_5_3 | 0.63 | 4.0E+08 | 1.2E+08 | 1.5E+07 | 22.3 | 6.8 | 0.8 |
| 11 | 5_5_4 | 0.75 | 5.1E+08 | 1.8E+08 | 2.5E+07 | 28.6 | 10.3 | 1.4 |
| 12 | 5_5_5 | 0.89 | 5.7E+08 | 2.5E+08 | 4.8E+07 | 31.9 | 14.3 | 2.7 |
| 13 | 5_10_0 | 0.54 | 3.4E+08 | 7.7E+07 | 5.2E+06 | 19.0 | 4.3 | 0.3 |
| 14 | 5_10_1 | 0.61 | 3.9E+08 | 1.0E+08 | 9.2E+06 | 22.1 | 5.8 | 0.5 |
| 15 | 5_10_2 | 0.69 | 4.6E+08 | 1.4E+08 | 1.7E+07 | 26.0 | 8.1 | 1.0 |
| 16 | 5_10_3 | 0.78 | 5.3E+08 | 2.0E+08 | 2.6E+07 | 29.7 | 11.1 | 1.5 |
| 17 | 5_10_4 | 0.89 | 6.0E+08 | 2.6E+08 | 4.6E+07 | 33.4 | 14.5 | 2.6 |
| 18 | 5_10_5 | 1.00 | 6.6E+08 | 3.0E+08 | 7.1E+07 | 37.0 | 16.6 | 4.0 |

Table S.4b: Global annual maximum efficient CDR [gt CO2 yr-1] for simulations cases with pCO2 = 10,000 ppm for terrestrial surface covered by cropland and grassland based on 2024 data from Dynamic World1 (2024-01-01 to 2024-12-31). In addition, combined cropland and grassland area [ha] and percentage of total cropland and grassland [%] with maximum efficient CDR [tn CO2 ha-1 yr-1] exceeding 0.5, 1, and 2 tn CO2 ha-1 yr-1 are provided. The simulation code refers to pCO2, calcite SI, and Mg concentrations, e.g. 10_5_1: pCO2 = 10,000 ppm, calcite SI = 0.5, [Mg] = 1 mM.

|  |  | **Global annual maximum achievable CDR**  **[gt CO2 yr-1]** | **Land area [ha] with maximum achievable CDR [tn CO2 ha-1 yr-1] greater than** | | | **Percentage of crop- and grasslands [%] with maximum achievable CDR [tn CO2 ha-1 yr-1] greater than** | | |
| --- | --- | --- | --- | --- | --- | --- | --- | --- |
| **Simulation** | **Code** | **0.5** | **1.0** | **2.0** | **0.5** | **1.0** | **2.0** |
| 19 | 10_0_0 | 0.32 | 1.2E+08 | 1.1E+07 | 1.4E+05 | 6.5 | 0.6 | 0.0 |
| 20 | 10_0_1 | 0.39 | 1.9E+08 | 2.4E+07 | 1.4E+05 | 10.8 | 1.4 | 0.0 |
| 21 | 10_0_2 | 0.49 | 2.8E+08 | 6.3E+07 | 4.0E+06 | 15.8 | 3.5 | 0.2 |
| 22 | 10_0_3 | 0.61 | 3.7E+08 | 1.2E+08 | 1.4E+07 | 20.9 | 6.5 | 0.8 |
| 23 | 10_0_4 | 0.74 | 5.0E+08 | 1.7E+08 | 2.5E+07 | 28.2 | 9.8 | 1.4 |
| 24 | 10_0_5 | 0.88 | 5.6E+08 | 2.5E+08 | 4.7E+07 | 31.2 | 14.1 | 2.6 |
| 25 | 10_5_0 | 0.47 | 2.8E+08 | 4.7E+07 | 2.0E+06 | 15.6 | 2.6 | 0.1 |
| 26 | 10_5_1 | 0.54 | 3.3E+08 | 7.8E+07 | 5.2E+06 | 18.7 | 4.4 | 0.3 |
| 27 | 10_5_2 | 0.63 | 4.1E+08 | 1.1E+08 | 1.2E+07 | 22.8 | 6.4 | 0.7 |
| 28 | 10_5_3 | 0.73 | 5.0E+08 | 1.7E+08 | 1.9E+07 | 27.8 | 9.5 | 1.1 |
| 29 | 10_5_4 | 0.84 | 5.5E+08 | 2.3E+08 | 3.7E+07 | 31.0 | 13.1 | 2.1 |
| 30 | 10_5_5 | 0.97 | 6.4E+08 | 2.8E+08 | 6.3E+07 | 35.6 | 15.8 | 3.5 |
| 31 | 10_10_0 | 0.71 | 5.0E+08 | 1.5E+08 | 1.9E+07 | 28.0 | 8.4 | 1.1 |
| 32 | 10_10_1 | 0.78 | 5.4E+08 | 1.9E+08 | 2.3E+07 | 30.1 | 10.6 | 1.3 |
| 33 | 10_10_2 | 0.86 | 6.0E+08 | 2.4E+08 | 3.5E+07 | 33.4 | 13.4 | 2.0 |
| 34 | 10_10_3 | 0.94 | 6.4E+08 | 2.7E+08 | 5.3E+07 | 35.8 | 15.4 | 2.9 |
| 35 | 10_10_4 | 1.04 | 6.9E+08 | 3.1E+08 | 7.5E+07 | 38.6 | 17.5 | 4.2 |
| 36 | 10_10_5 | 1.15 | 7.3E+08 | 3.4E+08 | 9.6E+07 | 41.2 | 19.3 | 5.4 |

Table S.4c: Global annual maximum efficient CDR [gt CO2 yr-1] for simulations cases with pCO2 = 20,000 ppm for terrestrial surface covered by cropland and grassland based on 2024 data from Dynamic World1 (2024-01-01 to 2024-12-31). In addition, combined cropland and grassland area [ha] and percentage of total cropland and grassland [%] with maximum efficient CDR [tn CO2 ha-1 yr-1] exceeding 0.5, 1, and 2 tn CO2 ha-1 yr-1 are provided. The simulation code refers to pCO2, calcite SI, and Mg concentrations, e.g. 20_5_1: pCO2 = 20,000 ppm, calcite SI = 0.5, [Mg] = 1 mM.

|  |  | **Global annual maximum achievable CDR**  **[gt CO2 yr-1]** | **Land area [ha] with maximum achievable CDR [tn CO2 ha-1 yr-1] greater than** | | | **Percentage of crop- and grasslands [%] with maximum achievable CDR [tn CO2 ha-1 yr-1] greater than** | | |
| --- | --- | --- | --- | --- | --- | --- | --- | --- |
| **Simulation** | **Code** | **0.5** | **1.0** | **2.0** | **0.5** | **1.0** | **2.0** |
| 37 | 20_0_0 | 0.44 | 2.4E+08 | 3.3E+07 | 3.6E+05 | 13.6 | 1.9 | 0.0 |
| 38 | 20_0_1 | 0.51 | 3.0E+08 | 6.2E+07 | 3.7E+06 | 16.6 | 3.5 | 0.2 |
| 39 | 20_0_2 | 0.59 | 3.7E+08 | 9.8E+07 | 9.2E+06 | 20.9 | 5.5 | 0.5 |
| 40 | 20_0_3 | 0.70 | 4.7E+08 | 1.5E+08 | 1.8E+07 | 26.4 | 8.5 | 1.0 |
| 41 | 20_0_4 | 0.82 | 5.5E+08 | 2.3E+08 | 3.4E+07 | 30.6 | 12.8 | 1.9 |
| 42 | 20_0_5 | 0.96 | 6.3E+08 | 2.8E+08 | 6.2E+07 | 35.3 | 15.6 | 3.5 |
| 43 | 20_5_0 | 0.64 | 4.2E+08 | 1.1E+08 | 9.9E+06 | 23.7 | 6.3 | 0.6 |
| 44 | 20_5_1 | 0.70 | 4.9E+08 | 1.5E+08 | 1.8E+07 | 27.3 | 8.2 | 1.0 |
| 45 | 20_5_2 | 0.78 | 5.3E+08 | 1.9E+08 | 2.3E+07 | 29.9 | 10.7 | 1.3 |
| 46 | 20_5_3 | 0.87 | 6.0E+08 | 2.5E+08 | 4.0E+07 | 33.6 | 13.8 | 2.2 |
| 47 | 20_5_4 | 0.98 | 6.5E+08 | 2.8E+08 | 6.3E+07 | 36.3 | 15.8 | 3.5 |
| 48 | 20_5_5 | 1.09 | 7.1E+08 | 3.2E+08 | 8.8E+07 | 39.8 | 18.0 | 4.9 |
| 49 | 20_10_0 | 0.95 | 6.5E+08 | 2.8E+08 | 4.7E+07 | 36.7 | 15.6 | 2.6 |
| 50 | 20_10_1 | 1.02 | 6.9E+08 | 3.0E+08 | 6.3E+07 | 38.5 | 16.7 | 3.5 |
| 51 | 20_10_2 | 1.09 | 7.4E+08 | 3.3E+08 | 7.9E+07 | 41.8 | 18.8 | 4.4 |
| 52 | 20_10_3 | 1.17 | 7.7E+08 | 3.7E+08 | 9.3E+07 | 43.4 | 20.6 | 5.2 |
| 53 | 20_10_4 | 1.26 | 8.1E+08 | 4.1E+08 | 1.2E+08 | 45.3 | 22.9 | 6.5 |
| 54 | 20_10_5 | 1.36 | 8.6E+08 | 4.5E+08 | 1.4E+08 | 48.1 | 25.2 | 7.8 |


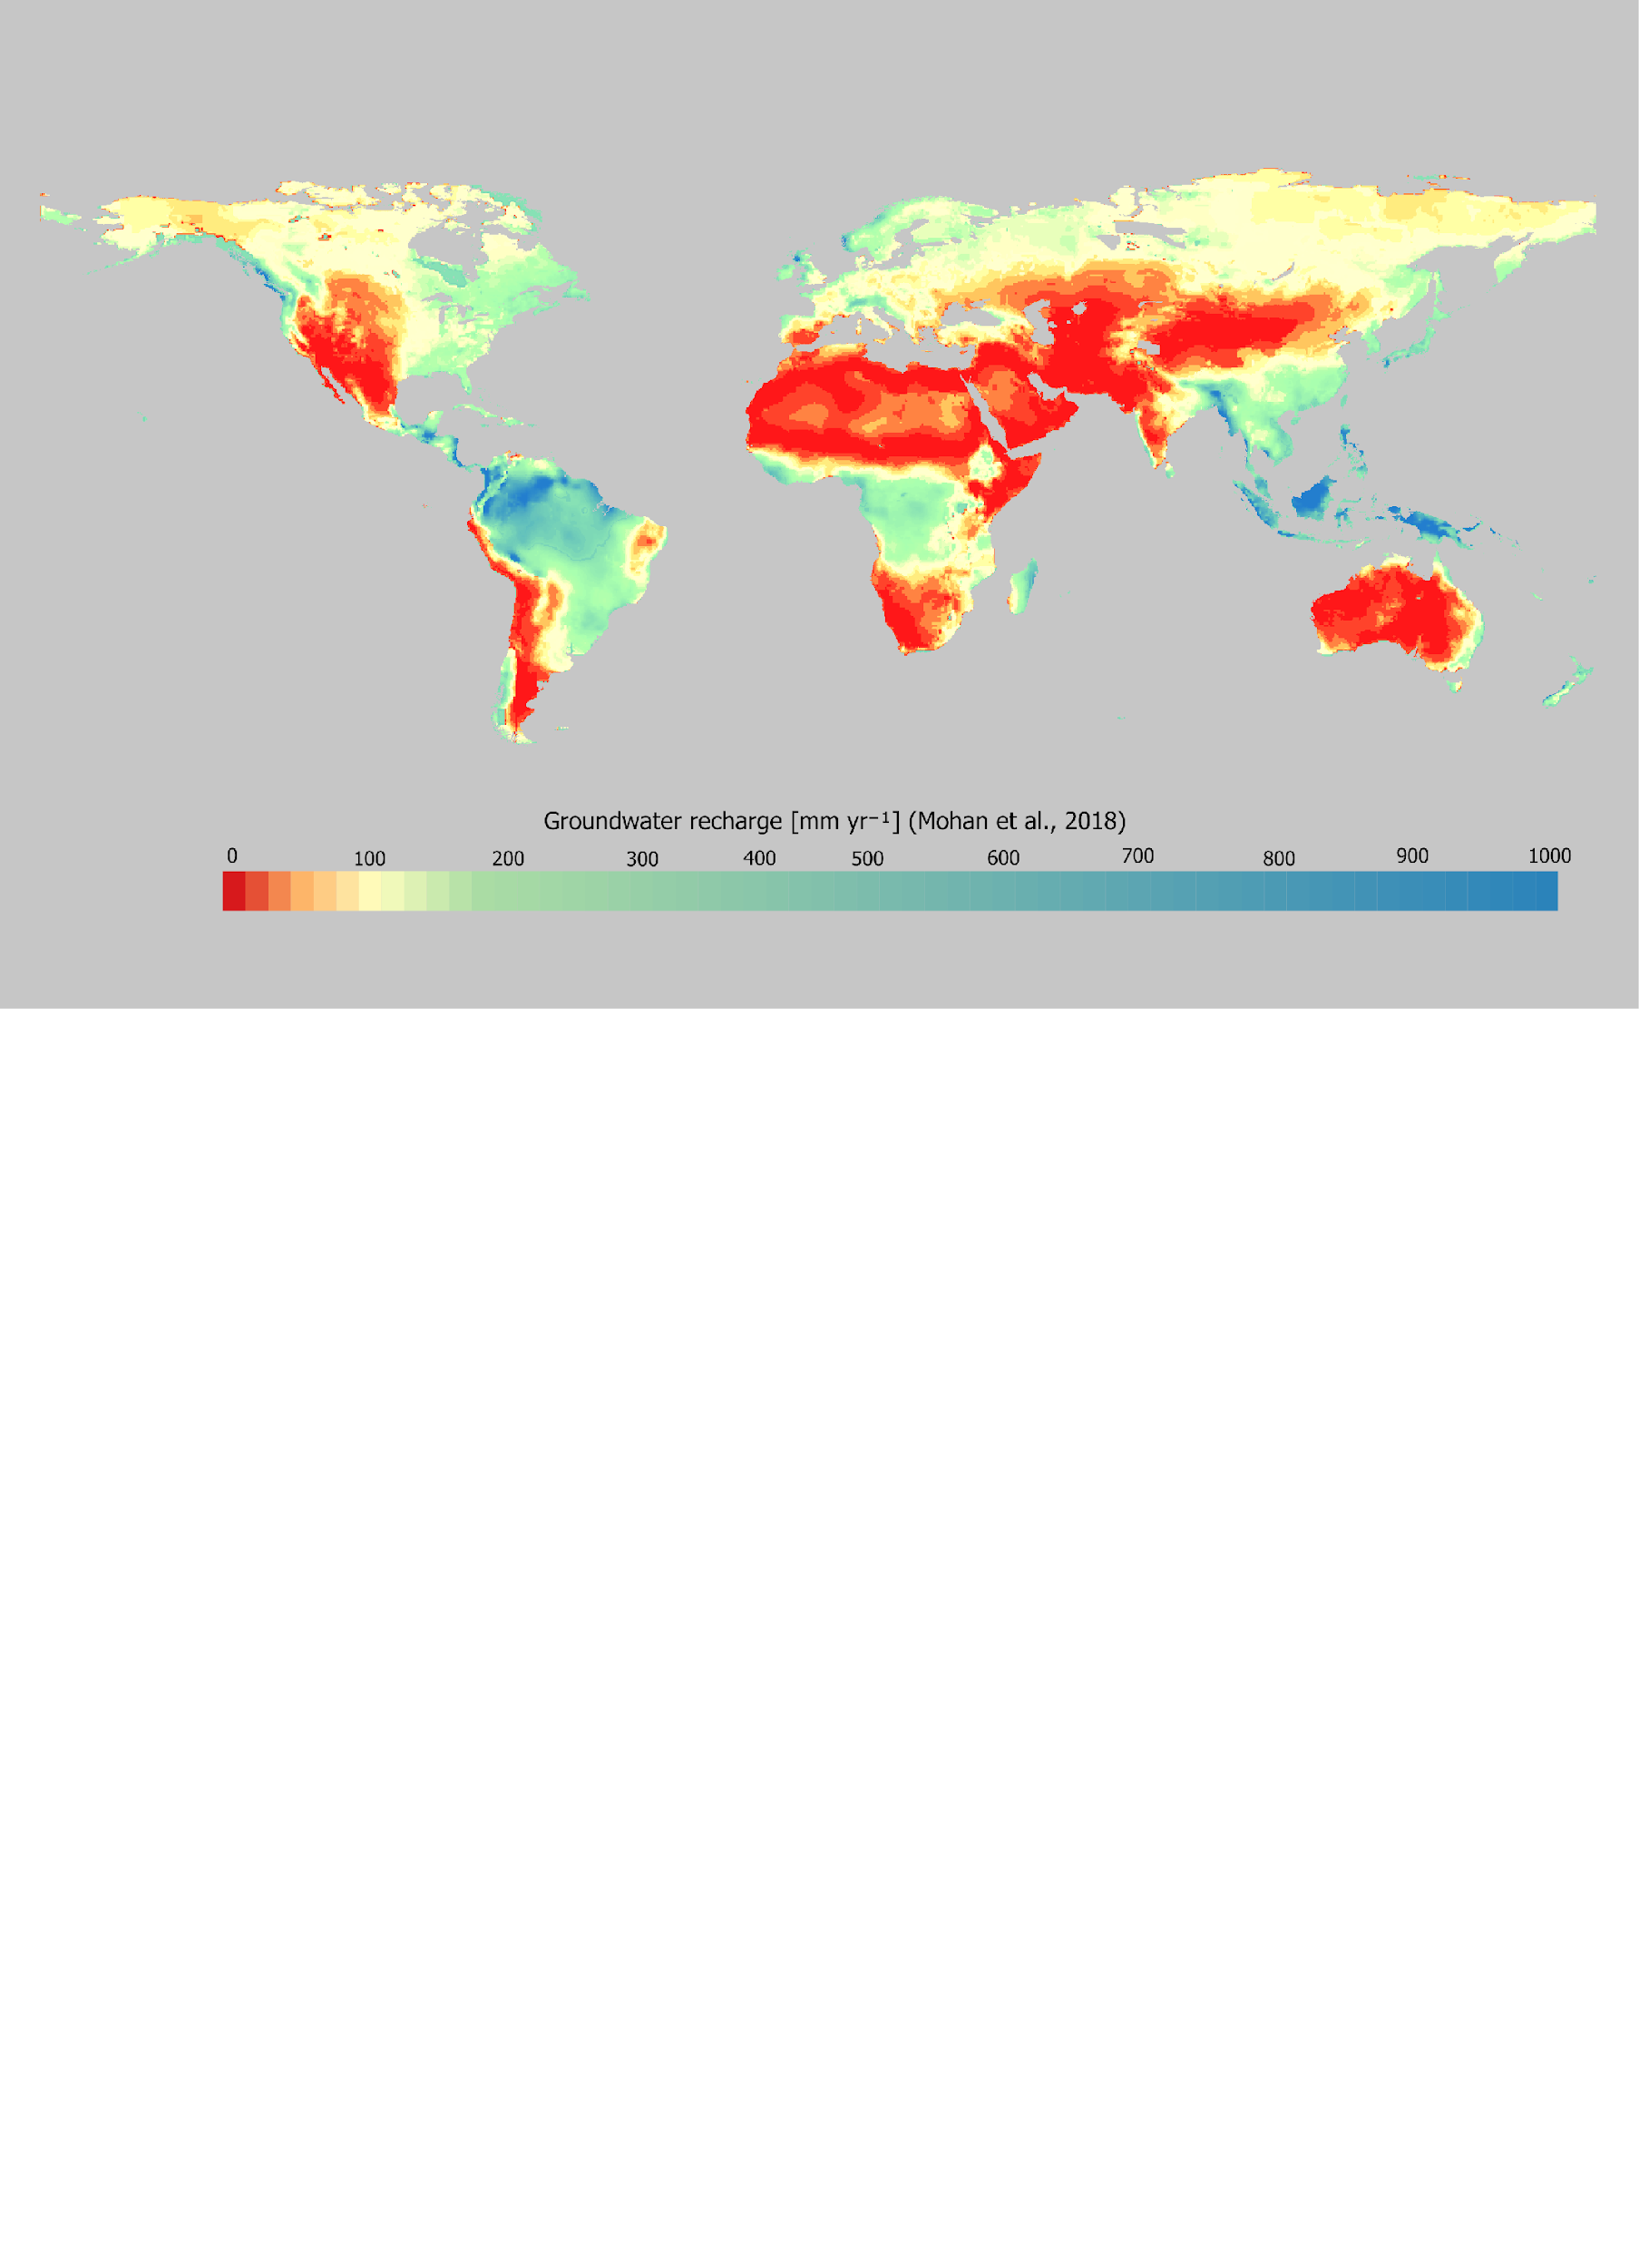


Figure S.1: Long-term (1981–2014) average annual groundwater recharge [mm yr-1], reproduced from Mohan et al2.


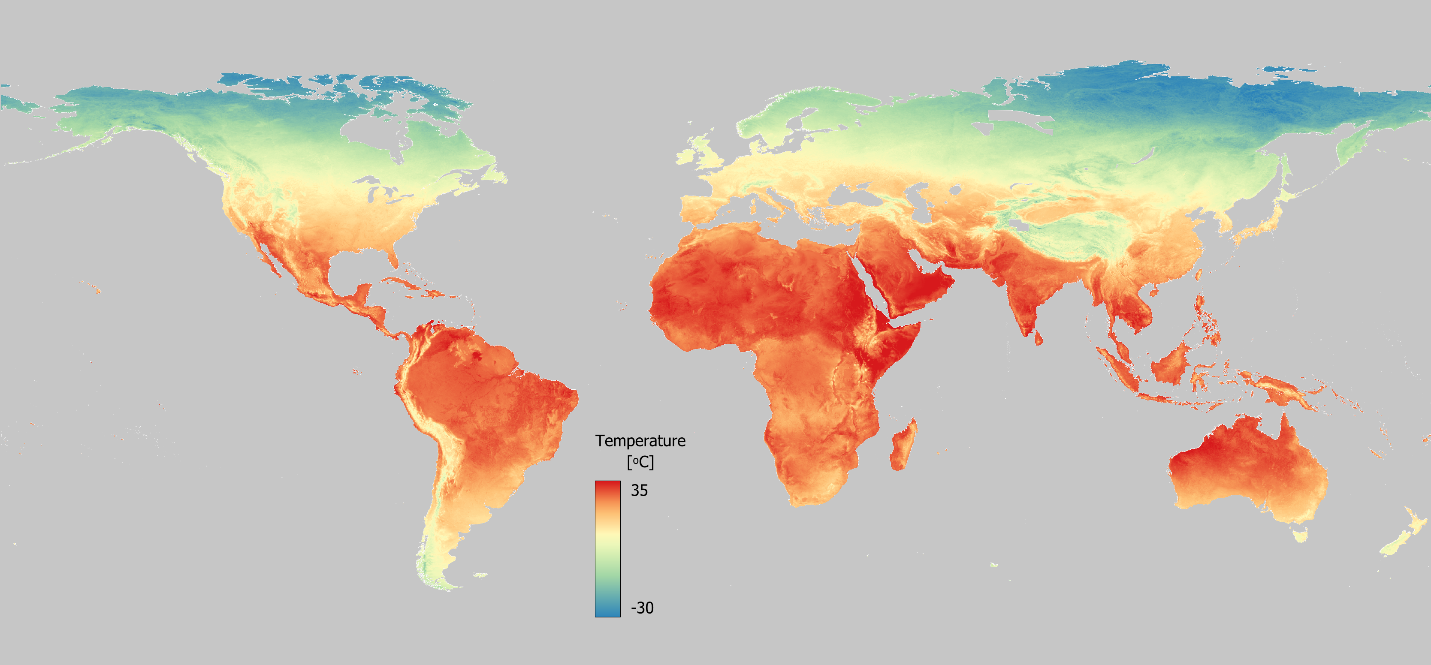


Figure S.2: Global distribution of average annual surface temperatures [°C] in 2024. Temperature data is based on the average of daytime and nighttime temperatures from the MOD21C2 dataset from 2024-01-01 to 2024-12-313.

**
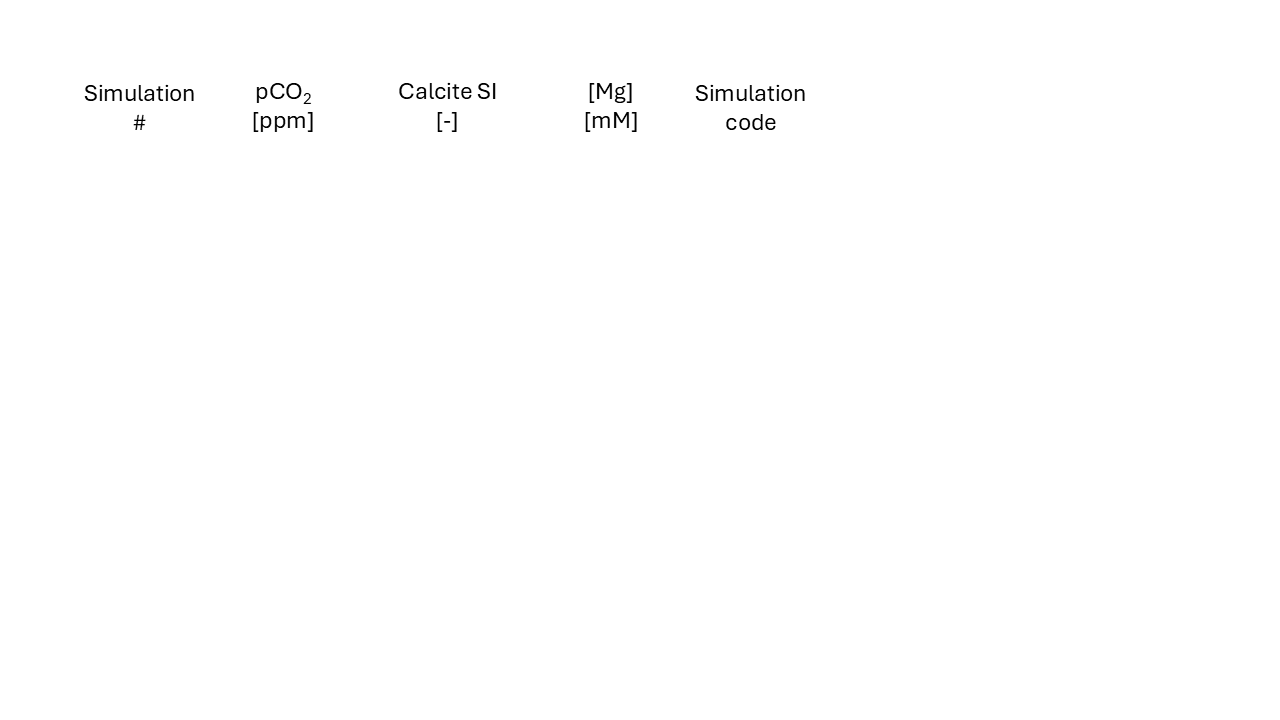
**

**
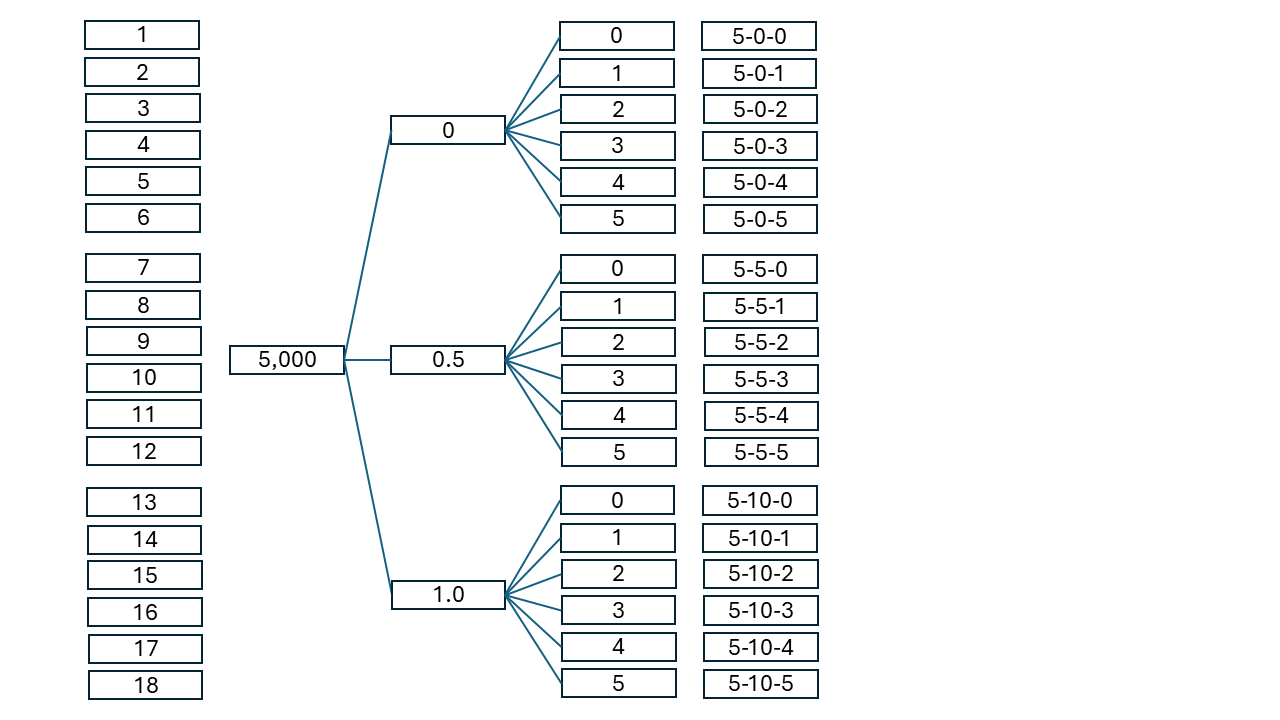
**

**
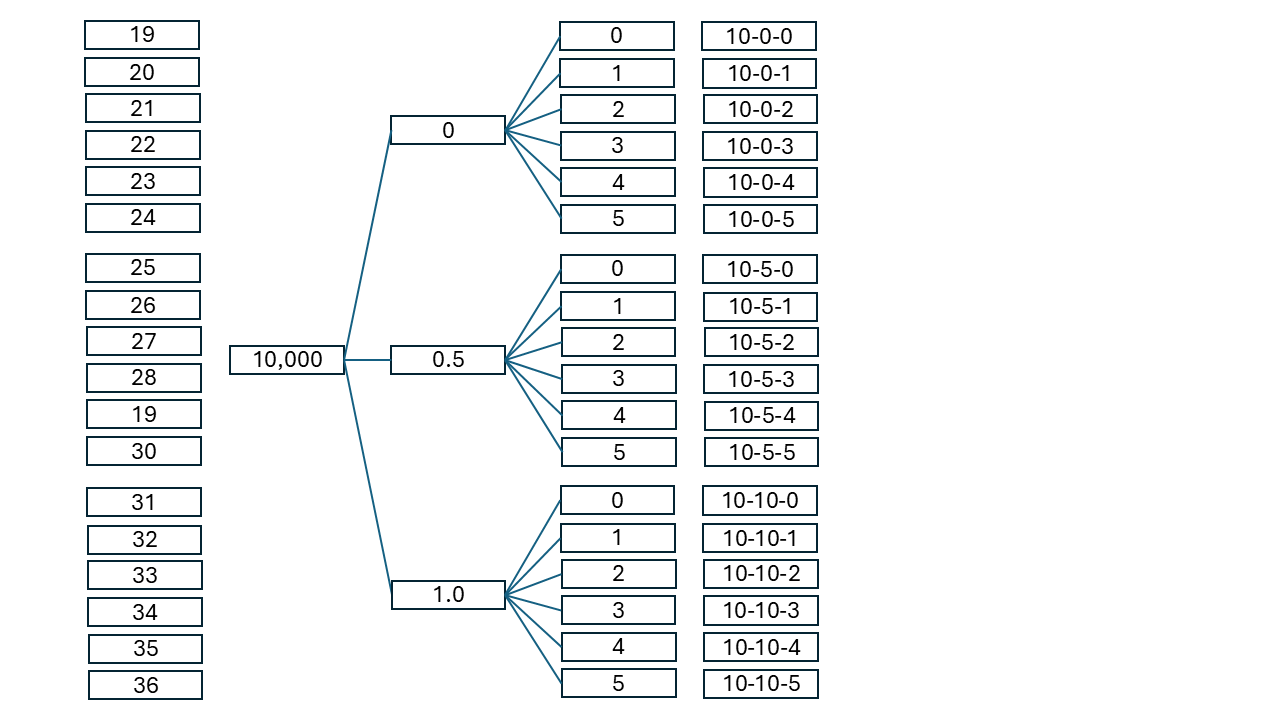
**

**
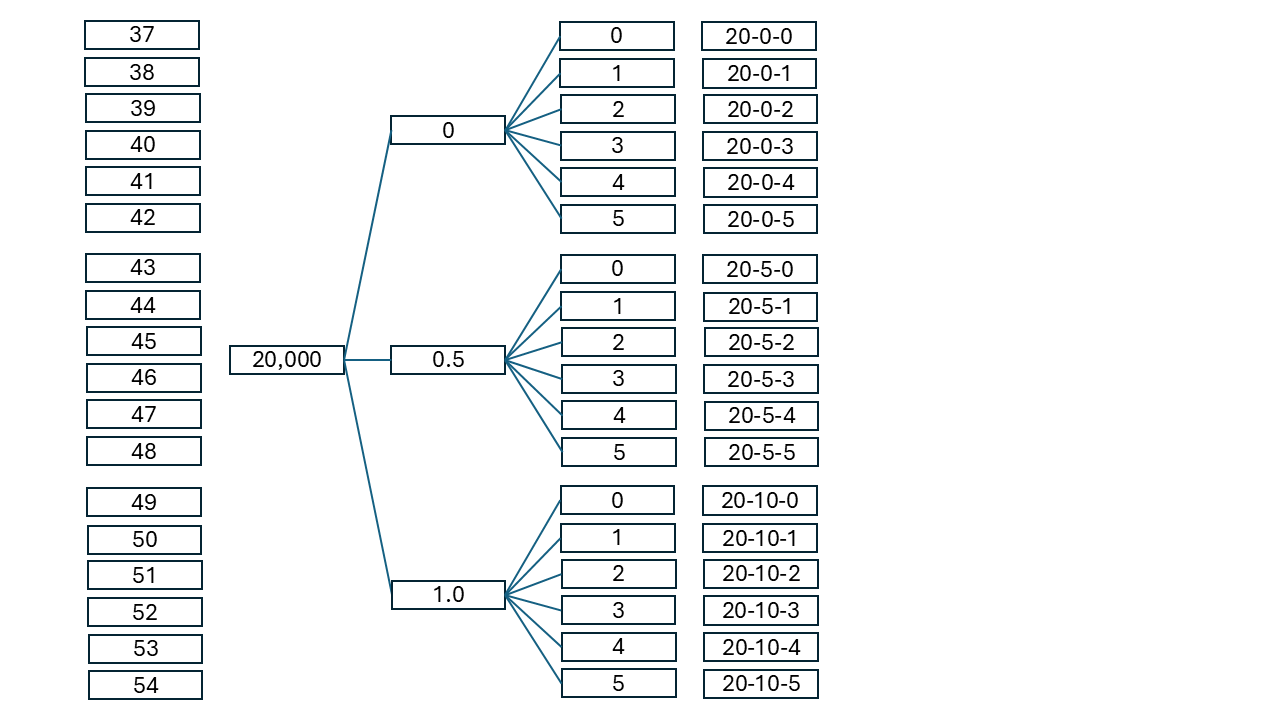
**

Figure S.3: Simulation grid for a range of pCO2 values (5,000, 10,000 and 20,000ppm), calcite saturation indices (SI = 0.0, 0.5 and 1.0) and Mg-concentrations (0-5 mM, 24-122 mg L-1).


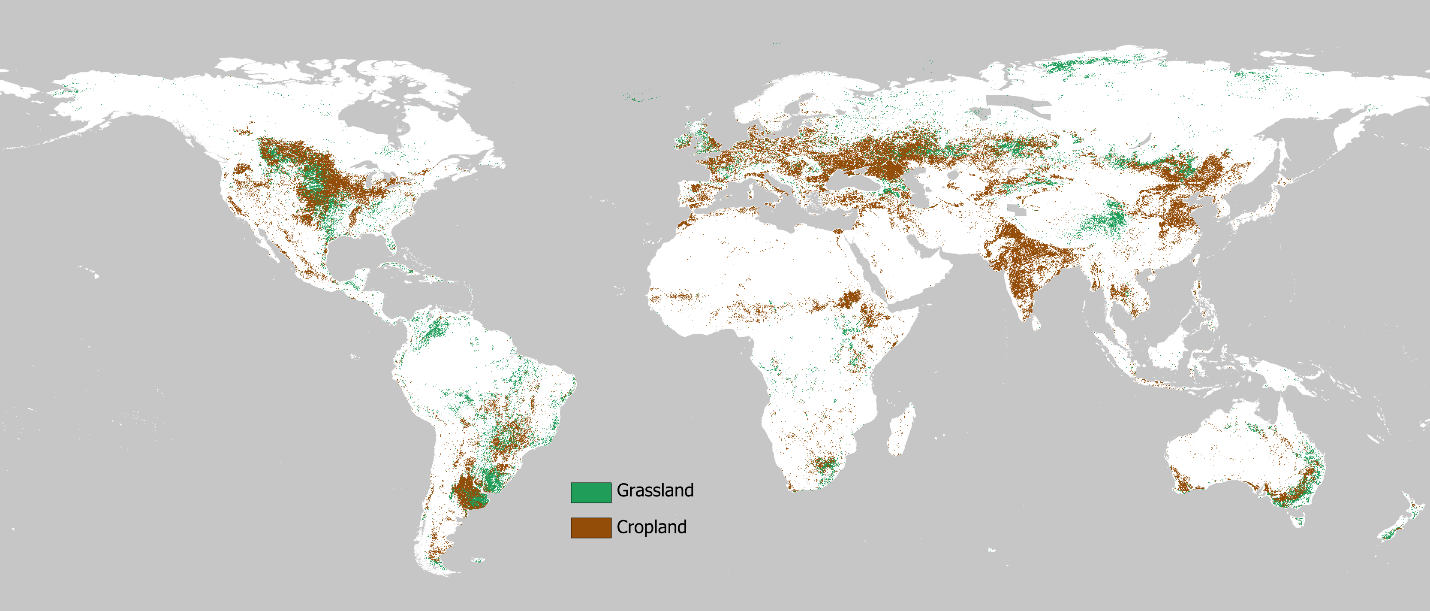


Figure S.4: Global map of cropland and grassland coverage, data from Dynamic World1 (2024-01-01 to 2024-12-31).


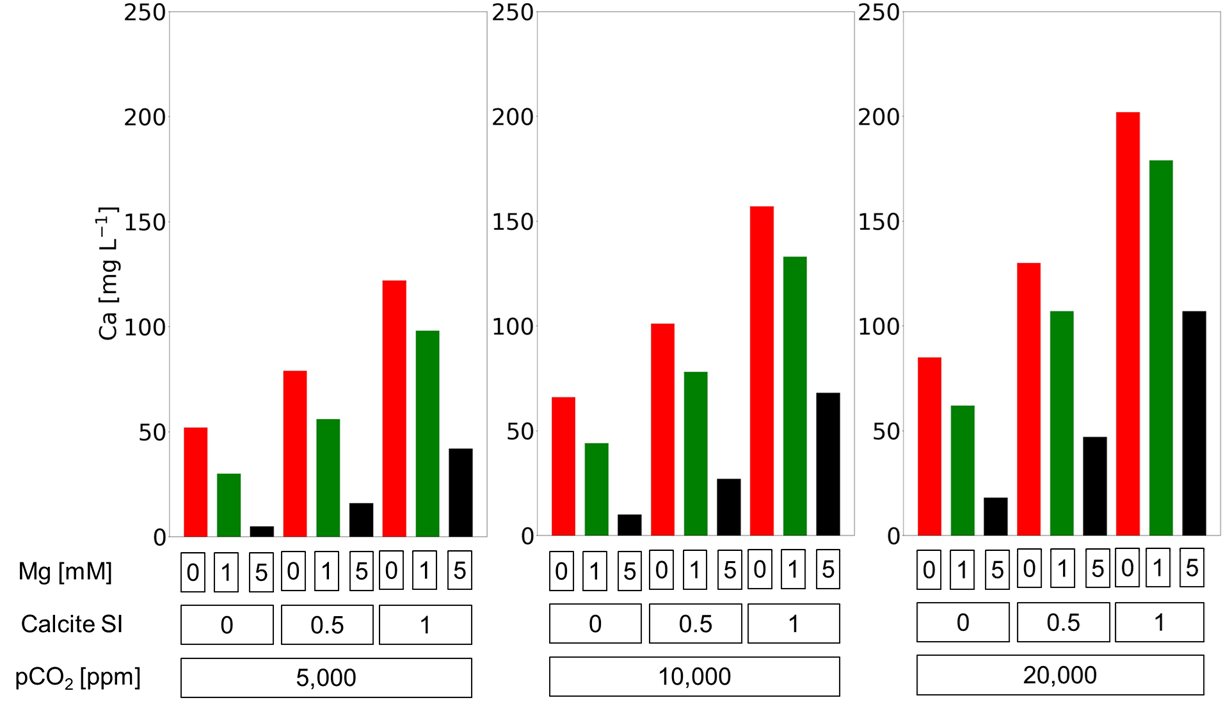


Figure S.5: Calculated Ca-concentrations for selected simulation cases at T = 25°C. Full water chemistry (pCO2, pH, Ca, Mg, DIC, alkalinity) for all simulation cases is provided in tabular form in Table S.1.


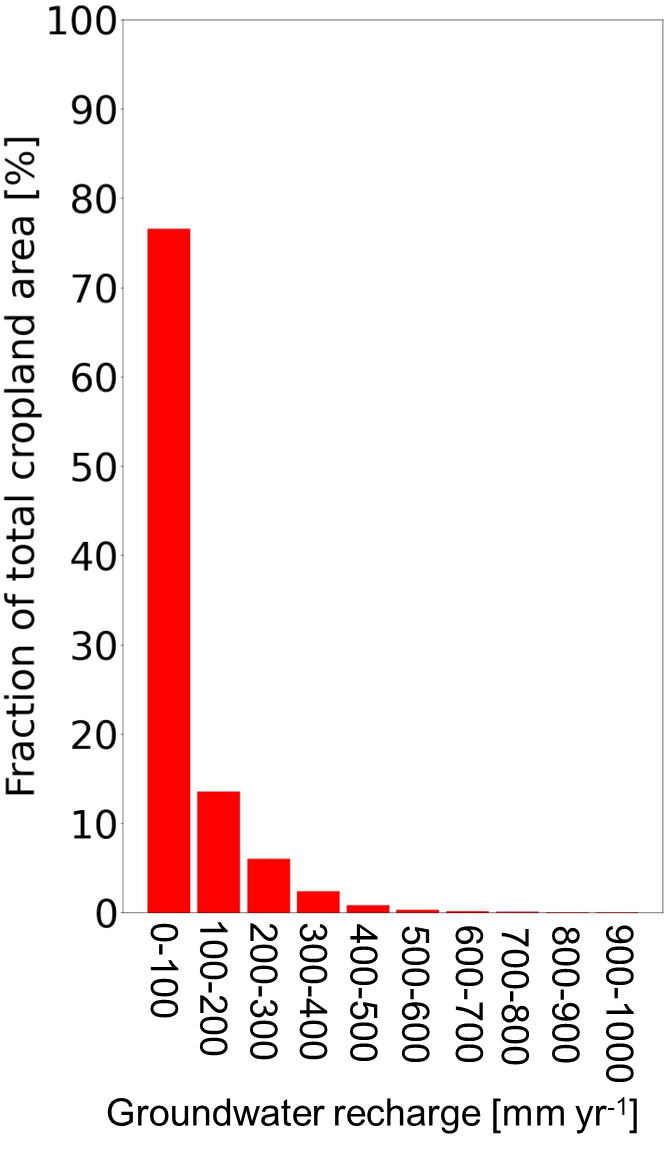

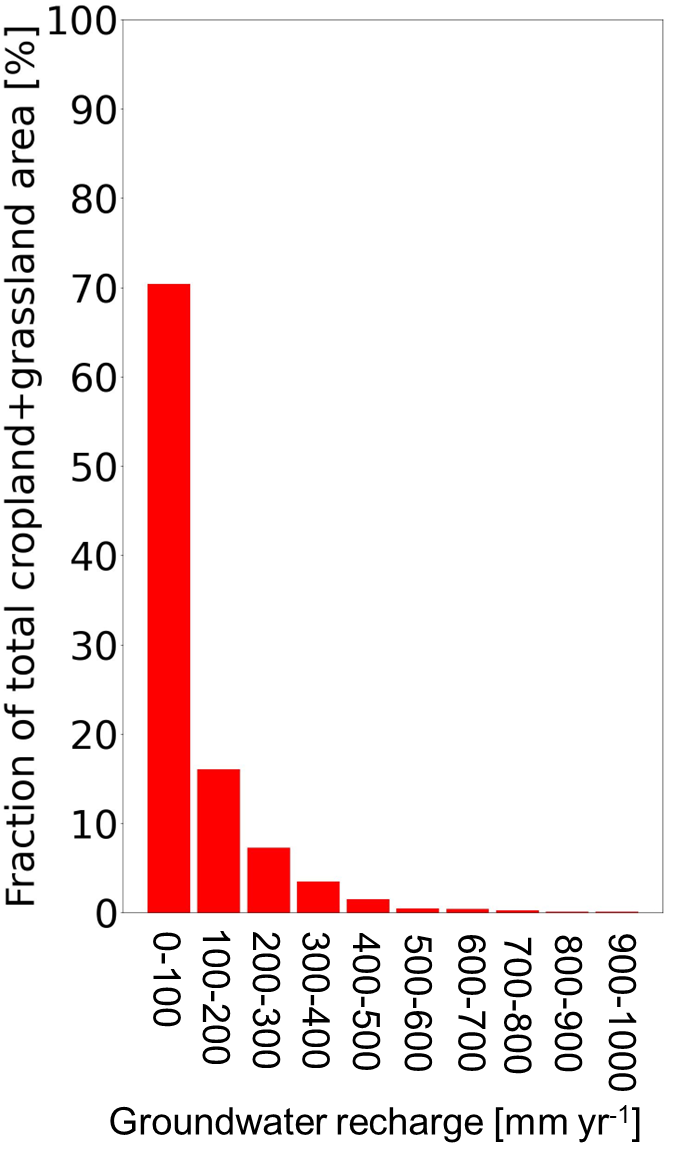


Figure S.6. Areal frequency distributions of recharge rates for cropland (left) and cropland+grassland (right) covering the range of recharge rates inferred by Mohan et al.2.


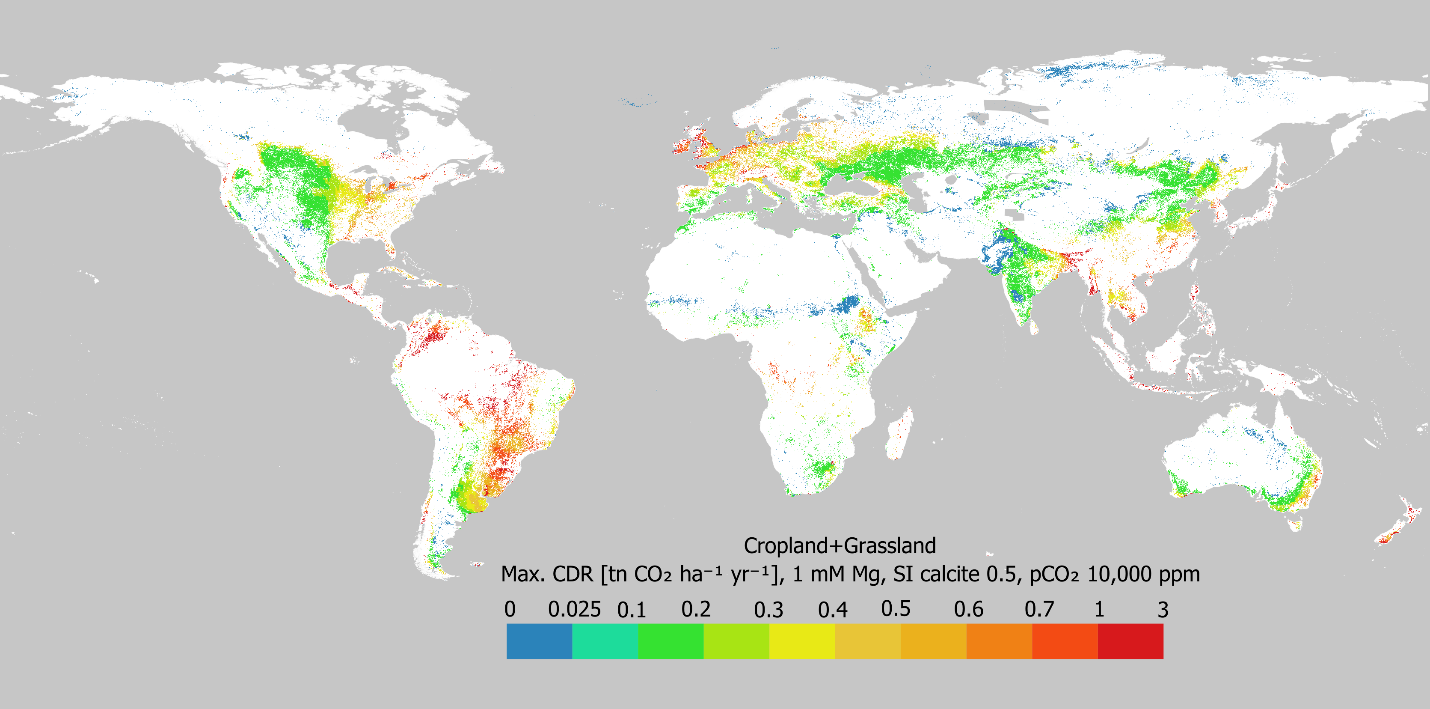


Figure S.7: Global map of maximum efficient CDR on cropland and grassland as a function of effective groundwater recharge and average annual surface temperature determined based on simulation 26 (pCO2 = 10,000ppm, calcite SI = 0.5, Mg concentration 1 mmol L-1 (24 mg L-1)).


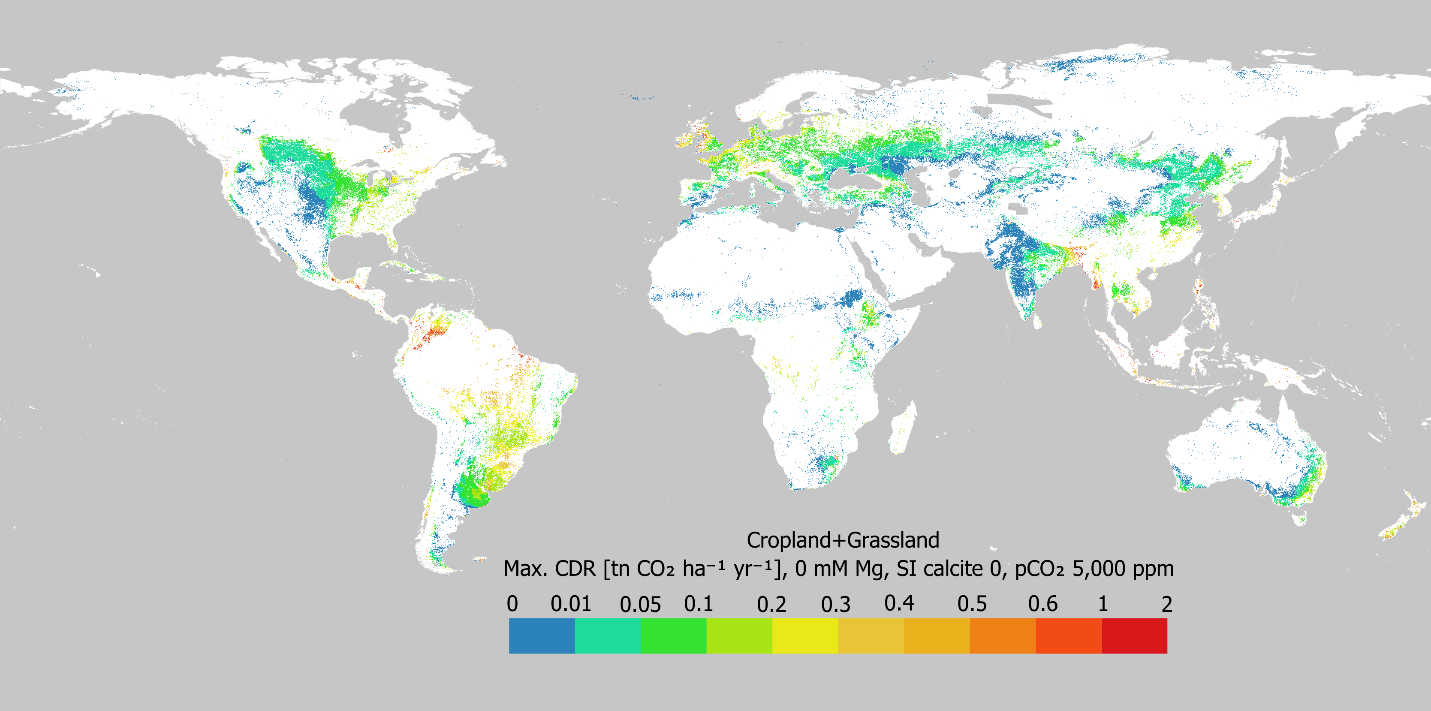


Figure S.8: Global map of maximum efficient CDR on cropland as a function of effective groundwater recharge and average annual surface temperature determined based on simulation 1 (pCO2 = 5,000ppm, calcite SI = 0, Mg concentration 0 mmol L-1 (0 mg L-1)). This simulation represents the lower limit for maximum efficient CDR considered in the present study when considering cropland only.


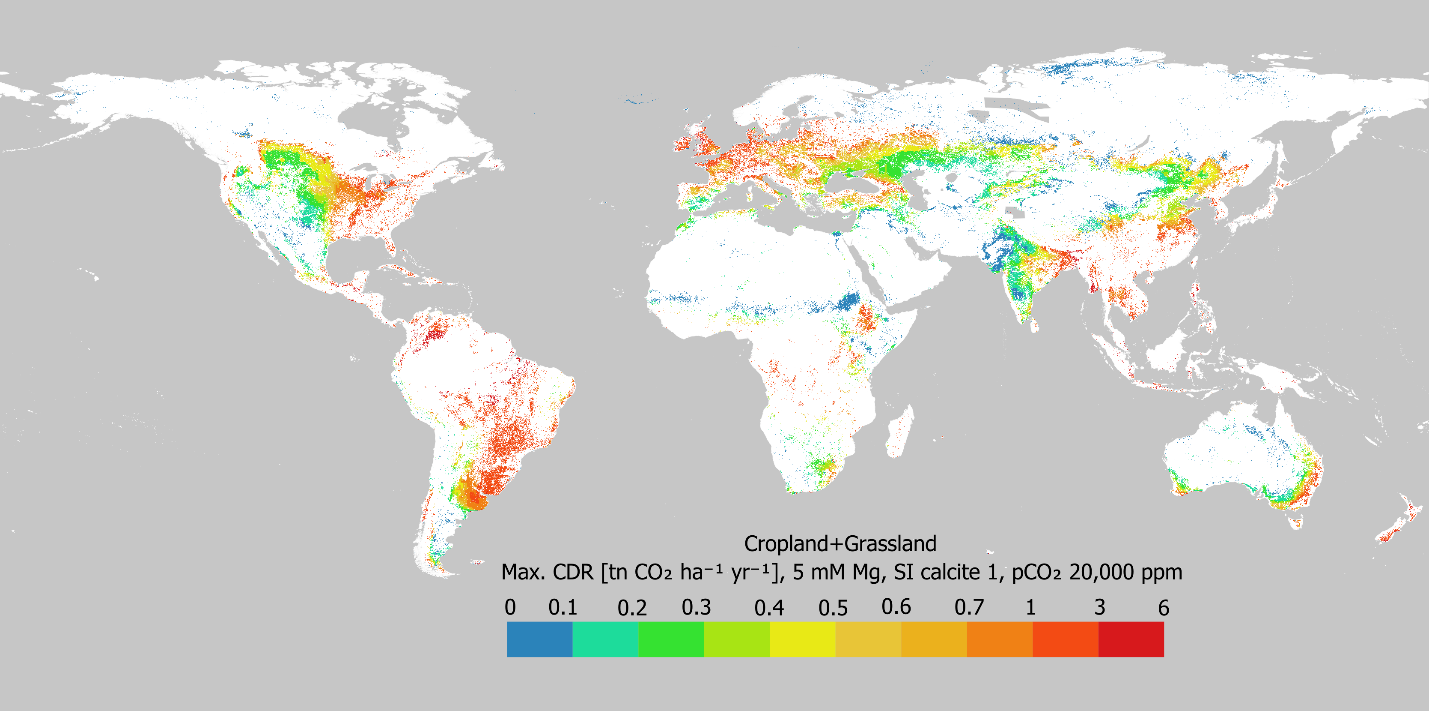


Figure S.9: Global map of maximum efficient CDR on cropland as a function of effective groundwater recharge and average annual surface temperature determined based on simulation 54 (pCO2 = 20,000ppm, calcite SI = 1.0, Mg concentration 5 mmol L-1 (122 mg L-1)). This simulation represents the upper limit for maximum efficient CDR considered in the present study when considering cropland only.

**References**

1. Brown, C. F. *et al.* Dynamic World, Near real-time global 10 m land use land cover mapping. *Scientific Data* **9**, 251 (2022).

2. Mohan, C., Western, A. W., Wei, Y. & Saft, M. Predicting groundwater recharge for varying land cover and climate conditions – a global meta-study. *Hydrology and Earth System Sciences* **22**, 2689–2703 (2018).

3. Hulley, G., Freepartner, R., Malakar, N. & Sarkar, S. Moderate Resolution Imaging Spectroradiometer (MODIS), Land Surface Temperature and Emissivity Product (MxD21), User Guide,Collection 6.1. (2022).
